# Supplementary material for: Selenocysteine Formation by Enterococcus faecium ABMC-05 Follows a Mechanism That Is Not Dependent on Genes selA and selD but on Gene cysK
Source: MDPI journal article supplement (doi:10.3390/fermentation9070684), 2023-07-20
Supplement: s1 [file s1]

**Table S1.** Viable count of *E. faecium* ABMC-05 in MRS culture medium at different concentrations of sodium selenite (from 0 to 100 mg/L) during 36 h of incubation

| <b>Na<sub>2</sub>SeO<sub>3</sub><br/>(mg/L)</b> | <b>Log CFU/mL<br/>36 hours</b> |
|-------------------------------------------------|--------------------------------|
| 0                                               | 8.69 <sup>a</sup> ±0.03        |
| 20                                              | 8.26 <sup>a</sup> ±0.50        |
| 40                                              | 7.66 <sup>a</sup> ±0.17        |
| 60                                              | 7.33 <sup>a</sup> ±0.12        |
| 80                                              | 7.15 <sup>a</sup> ±0.01        |
| 100                                             | 6.68 <sup>b</sup> ±0.07        |
| R <sup>2</sup>                                  | 0.9785                         |
